# Supplementary material for: Poly(methacrylic acid) complexation of amphotericin B to treat neglected diseases
Source: Royal Society of Chemistry journal article supplement (doi:10.1039/c3py01051a), 2013-10-08
Supplement: c3py01051a.pdf [file c3py01051a.pdf]

## Poly(methacrylic acid) complexation of amphotericin B

Karolina Alicja Les<sup>1,2</sup>, Abeer Mohamed Ahmed<sup>2,3</sup>, Sibulalan<sup>1,2</sup>, Ji-won Choi<sup>1</sup>, Denis Martin<sup>4</sup>, Vanessa Yardley<sup>5</sup>, Keith Powell<sup>1</sup>, Antony Godwin<sup>1</sup> and Steve Brocchini<sup>2,3</sup>

<sup>1</sup>PolyTherics Ltd, The London Bioscience Innovation Centre, 2 Royal College Street, London NW1 0NH, UK. <sup>2</sup>UCL School of Pharmacy, University College London, 29-39 Brunswick Square, London WC1N 1AX, UK. <sup>3</sup>NIHR Biomedical Research Centre, Moorfields Eye Hospital and UCL Institute of Ophthalmology, London, EC1V 9EL, UK. <sup>4</sup>Drugs for Neglected Diseases Initiative, 15 Chemin Louis-Dunant, 1202 Geneva, Switzerland. <sup>5</sup>Faculty of Infectious and Tropical Diseases, London School of Hygiene & Tropical Medicine, Keppel Street, WC1E 7HT, UK

### Supplementary experimental information

#### *Preparation of AmB-PMAA complexes from PMOSu*

Poly(*N*-methacryloxysuccinimide)<sup>1</sup> (PMOSu) **4** (60 mg, 0.3 mmol of the repeat unit) was dissolved in stirred DMSO (1.2 mL) overnight in a 50 mL round bottom flask. To this stirred solution was added a solution of AmB (48 mg, 0.05 mmol) in DMSO (1.4 mL). After 2 min, an aqueous solution of sodium hydroxide (0.656 mL 1 M NaOH and 110  $\mu$ L H<sub>2</sub>O) was added dropwise to the PMOSu/AmB solution followed by the immediate addition of pure water (6.7 mL). The resulting solution was left to stir at room temperature for 1 h. Uncomplexed AmB was then removed by 24 h dialysis against 1 L of pure water using a Visking dialysis membrane (MW12-14 kDa, Medicell International). During dialysis, the dialysate was changed six times. The dialysed solution of the complex was filtered using a 0.2  $\mu$ m Minisart<sup>®</sup> syringe filter (Fisher, Cat. No. FDP-620-030U) and then freeze-dried to afford a red coloured powder (mass 96.7 mg). Samples were protected from light by wrapping in aluminium foil at all times during preparation and storage.

### Reference

- (1) A. Godwin, M. Hartenstein, A. Müller and S. Brocchini, *Angew. Chem. Int. Ed. Engl.* 2001, **40**(3), 594-597.

## Supplementary Figures

**Figure S1**

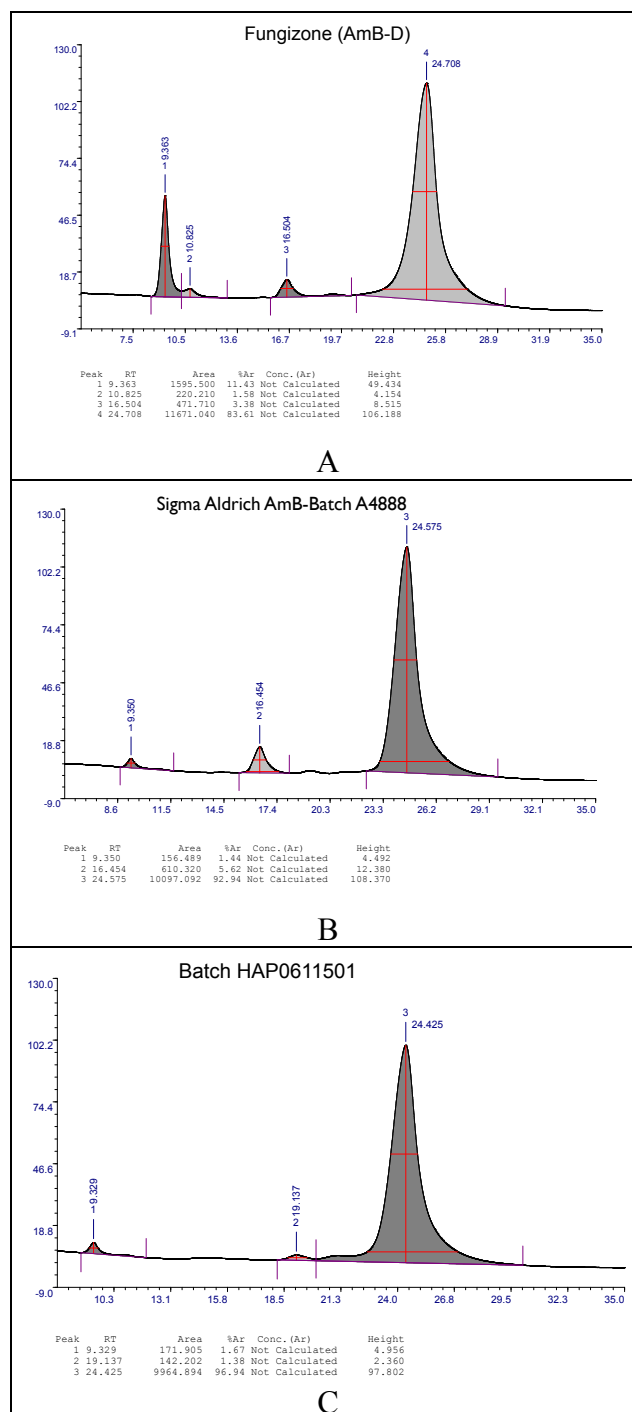

**Figure S1.** The HPLC chromatogram for Funigzone (AmB-D) (A) was obtained using the amount of AmB-D necessary to have a 60 µg/mL concentration of AmB and the chromatograms for (B) and (C) were obtained using 60 µg/mL of material. AmB eluted at ~24.5 minutes.

**Figure S2**

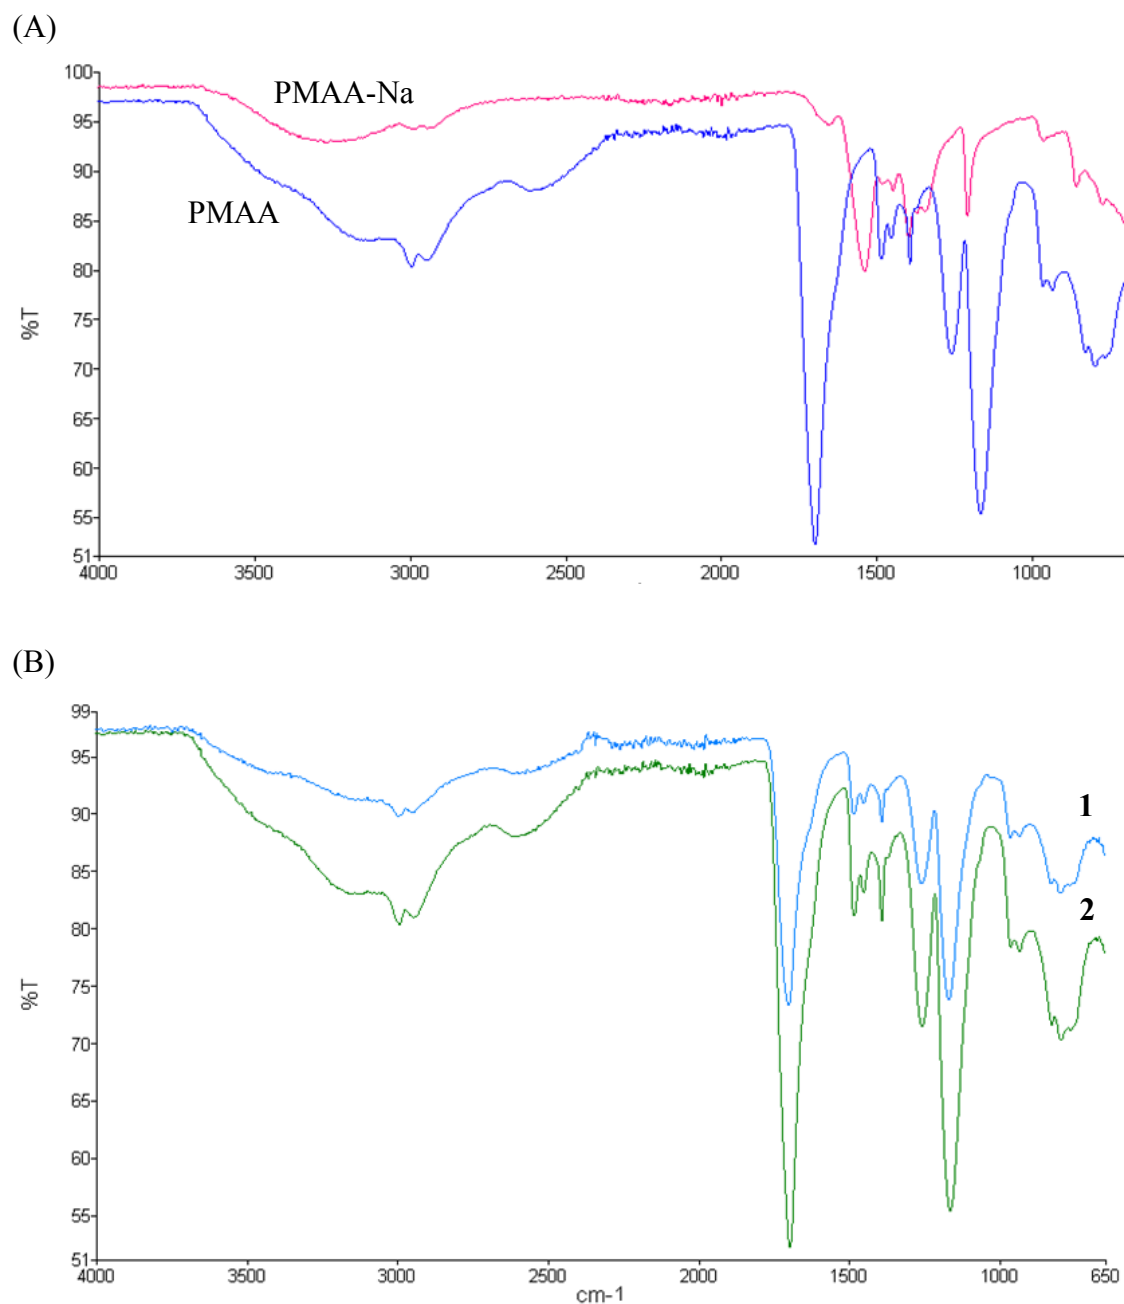

**Figure S2.** (A) Overlay of the FT-IR spectrum of PMAA and PMAA-Na. (B) Comparison of FT-IR spectra of PMAA protonated using salt precipitation method (1) and dialysis method (2).

**Figure S3**

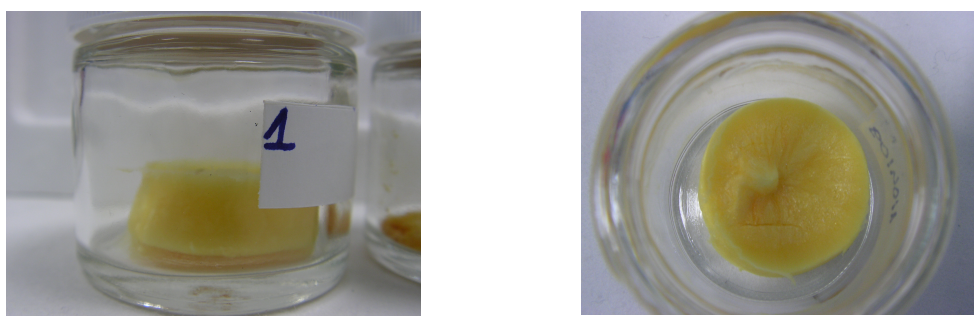

**Figure S3.** Photographic images of freeze-dried AmB-PMAA complex.

**Figure S4**

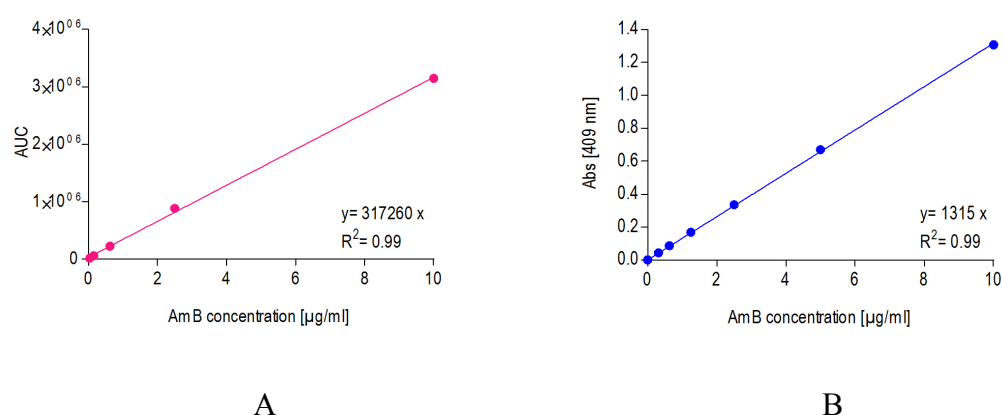

**Figure S4.** AmB Calibration curves. **(A)** AmB in 50% methanol measured by UV-Vis and **(B)** RP-HPLC where elution was conducted with a 1 mL/min gradient starting from 30% acetonitrile in 25 mM EDTA to 100% acetonitrile (20 min) using a SUPERCOSIL™ LC-18-DB column. Both detected at 409 nm and  $N = 3$ .

**Figure S5**

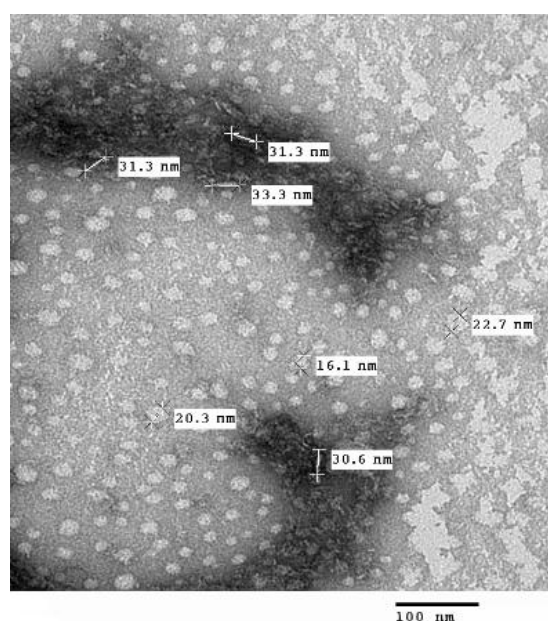

**Figure S5.** Image of the AmB-PMAA complex **3** by transmission electron microscopy (Direct Mag 93000). The AmB-PMAA complex contained 35 wt% AmB and was fabricated from PMAA with a molecular weight of 31.1 kDa.

## Supplementary Tables

**Table S1**

| Batch | PVP:PMAA<br>(mol:mol) | AmB in<br>complex<br>[Wt%] | Amount<br>PMAA used<br>(mg) | Amount<br>PVP used<br>(mg) | Amount<br>AmB used<br>(mg) |
|-------|-----------------------|----------------------------|-----------------------------|----------------------------|----------------------------|
| 1     | 0                     | 2                          | 0                           | 12.5                       | 12.5                       |
| 2     | 0.5                   | 19                         | 20                          | 26                         | 20                         |
| 3     | 1                     | 35                         | 20                          | 0                          | 20                         |

**Table S1.** The AmB content in a complex prepared when using PVP (58 kDa) as the only polymer for complexation (Batch 1) was very low. Increased AmB loading was observed when the relative amount of PMAA (31.1 kDa) was also increased.

**Table S2**

| AmB<br>(mg) | PMAA<br>(mg) | AmB<br>content-<br>UV<br>(wt%) | AmB<br>loading-<br>HPLC<br>(wt%) | AmB<br>complexation<br>efficiency<br>(%) | Yield [%] |
|-------------|--------------|--------------------------------|----------------------------------|------------------------------------------|-----------|
| 52          | 70           | 25                             | 23                               | 50                                       | 81        |
| 112         | 70           | 36                             | 34                               | 40                                       | 64        |
| 150         | 70           | 41                             | 46                               | 44                                       | 70        |
| 131         | 100          | 36                             | --                               | 52                                       | 77        |
| 252         | 200          | 33                             | 37                               | 46                                       | 74        |

**Table S2.** AmB content, complexation efficiency and complex preparation yields for selected samples prepared using different ratios of AmB to PMAA at different scales of complexation.

**Table S3**

| PMAA MWt<br>(kDa) | AmB content<br>(wt%) |
|-------------------|----------------------|
| 7.5               | 35 ± 2               |
| 31.1              | 33 ± 5               |
| 100               | 28 ± 3               |
| 7.5*              | 30                   |
| 31.1*             | 32 ± 3               |
| 65.5*             | 31 ± 1               |
| 100*              | 32                   |

**Table S3.** The effect of the MW of PMAA used to prepare a complex and the AmB content in the final complex. All samples, prepared in triplicates, were prepared with a targeted AmB content of 30 wt% using the same weight ratios of AmB to PMAA.

\*PVP present.
